# Supplementary material for: Refractory pituitary adenoma: a novel classification for pituitary tumors
Source: PubMed Central journal article supplement (PMC5347795; doi:10.18632/oncotarget.13274), 2016-11-10
Supplement: oncotarget-07-83657-s001.pdf [file oncotarget-07-83657-s001.pdf]

## Refractory pituitary adenoma: a novel classification for pituitary tumors

### SUPPLEMENTARY TABLE

Supplementary Table S1: Clinical feature of typical pituitary adenomas and pituitary carcinomas

| Case | Sex | age (y) | PA   | Invasive (Y or N) | Ki-67 (%) | growth rate(%/m) | Atypical (Y or N) | Surgery (n) | RT         | medicine | Outcome     |
|------|-----|---------|------|-------------------|-----------|------------------|-------------------|-------------|------------|----------|-------------|
| 1    | F   | 46      | NFPA | N                 | 1%        | <2%              | N                 | 1           | N          | N        | Cured       |
| 2    | F   | 31      | ACTH | N                 | 2%        | <2%              | N                 | 1           | N          | N        | Cured       |
| 3    | F   | 26      | PRL  | N                 | 1%        | <2%              | N                 | 1           | N          | Y        | Cured       |
| 4    | M   | 35      | GH   | N                 | 1%        | <2%              | N                 | 1           | N          | Y        | Cured       |
| 5    | F   | 20      | PC   | Y                 | 10%       | >2%              | N                 | 4           | GKS and RT | Y        | Progression |

PC: pituitary carcinoma, GKS: gamma knife surgery; RT: radiotherapy; N: no; Y: yes
